# Supplementary material for: Vitamin D3 Metabolites Demonstrate Prognostic Value in EGFR-Mutant Lung Adenocarcinoma and Can be Deployed to Oppose Acquired Therapeutic Resistance
Source: MDPI journal article supplement (doi:10.3390/cancers12030675), 2020-03-13
Supplement: s1 [file s1]

**Supplemental table 1.** *EGFR* variants in the *EGFR*-mutant cohort

| EGFR variant                 | <30ng/ml 25(OH)D3 | >30ng/ml 25(OH)D3 |
|------------------------------|-------------------|-------------------|
| Exon 21 substitution, No (%) | 7 (54)            | 5 (63)            |
| Exon 19 deletion, No (%)     | 5 (38)            | 3 (37)            |
| Compound                     | 1 (8)             | 0 (0)             |
| Total                        | 13 (100)          | 8 (100)           |

**Supplemental Table 2.** *EGFR* genotypes for the models used in the current study

| Model Name | <i>EGFR</i> genotype             |
|------------|----------------------------------|
| H1975      | Exon 20 T790M + Exon 21 L858R    |
| H1975-OR   | Exon 20 T790M + Exon 21 L858R    |
| SH416      | Exon 19 deletion                 |
| SH416-ER   | Exon 19 deletion                 |
| PC9        | Exon 19 deletion                 |
| PC9-ER     | Exon 19 deletion                 |
| 13T PDO    | WT                               |
| VP2 PDO    | Exon 19 deletion + Exon 20 T790M |

Targeted sequencing of Exons 19-21 was performed according to the protocol described by Molina-Vila, et al. (JTO (2008) 3:1224-1235). For mutation detection, the resulting sequences were aligned against NCBI Reference Sequence NG\_007726.3 using the ClustalW2 alignment tool. No mutations were detected other than those listed.

**Supplemental Table 3.** Primer Sequences

| Gene           | Forward, 5'-3'           | Reverse, 5'-3'           |
|----------------|--------------------------|--------------------------|
| <i>EPCAM</i>   | GCTGGAATTGTTGTGCTGGTTA   | AAGATGTCTTCGTCCCACGC     |
| <i>CLDN4</i>   | TCTCCTCTGTTCCGGGTAGG     | CGTCCATCCACTCTGCACTT     |
| <i>MMP2</i>    | GGCTGTGTTCTTTGCAGGGAATGA | TGGGGAAGCCAGGATCCATTTTCT |
| <i>GAPDH</i>   | CTCCTCTGACTTCAACAGCG     | GCCAAATTCGTTGTCATACCAG   |
| <i>CYP24A1</i> | GCACAAGAGCCTCAACACCAA    | AGACTGTTTGCTGTCGTTTCCA   |
| <i>CAMP</i>    | TTCAAGAAGGACGGGCTGGTGAAG | GTCCTGGGTACAAGATTCCGCAAA |

**Supplemental Table 4.** Statistical analysis of SH416-ER relative cell growth at day 7

|             | Vehicle | 1,25(OH)2D3 | Erlotinib | 1,25(OH)2D3 +Erlotinib |
|-------------|---------|-------------|-----------|------------------------|
| Vehicle     | NA      | p<0.05      | p<0.01    | p<0.0001               |
| 1,25(OH)2D3 | p<0.05  | NA          | p=0.53    | p<0.01                 |
| Erlotinib   | p<0.01  | p=0.53      | NA        | p<0.01                 |

Data were analyzed using one-way ANOVA with multiple comparisons.

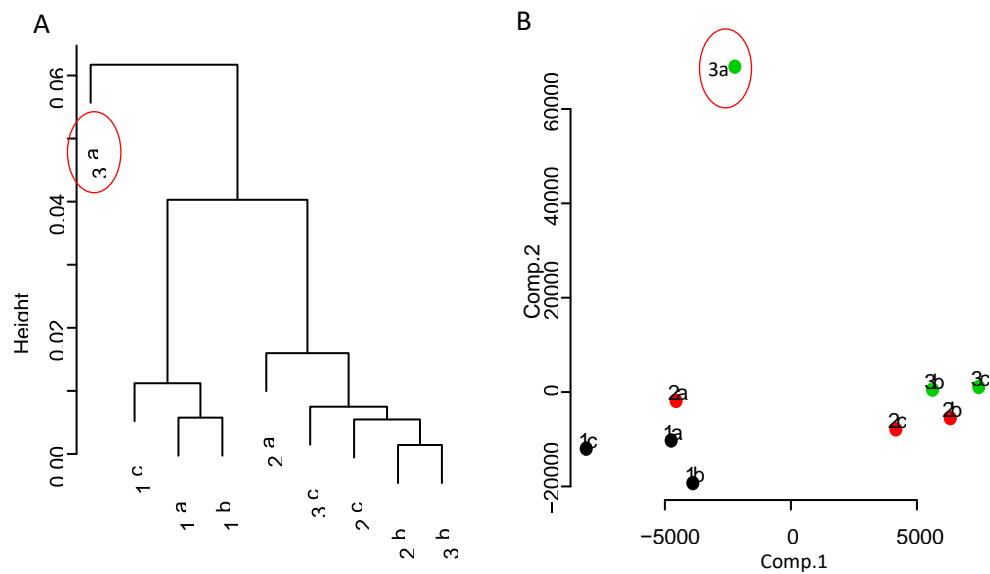

**Supplemental Figure 1.** Quality assessment analysis of the RNA sequencing results identified 3a sample as a deviation from the norm. Hierarchical clustering (A) and principal component analysis (B) revealed 3a as an atypical sample that strongly deviated in gene expression pattern from other samples in the same treatment group, as well as other samples in the same cell line. Therefore, sample 3a was excluded from further gene set enrichment analysis.

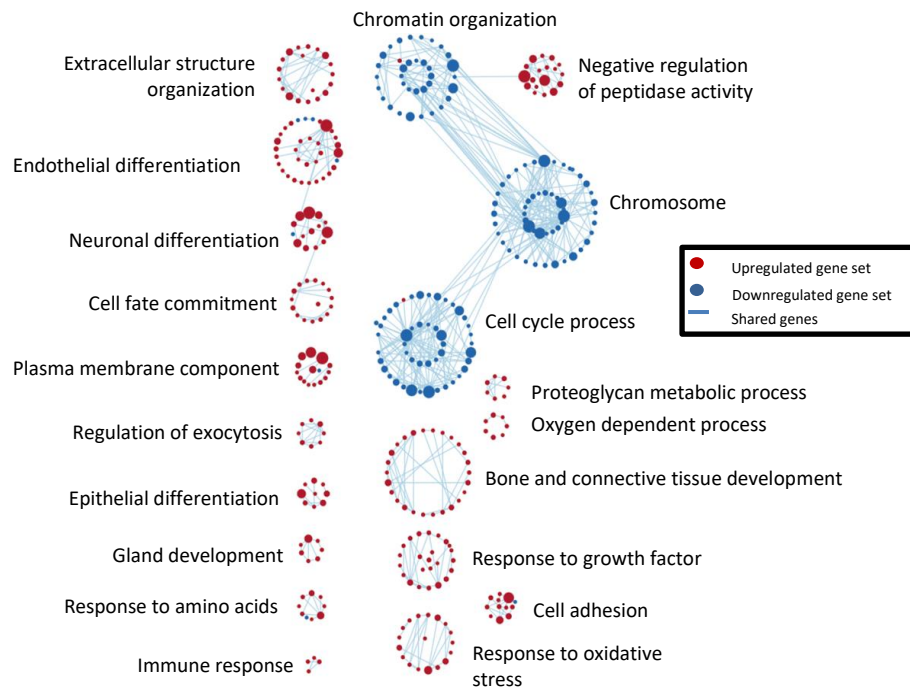

**Supplemental Figure 2.** Enrichment map of upregulated (red) and downregulated (blue) GO categories in H1975-OR cells treated with 1,25(OH)<sub>2</sub>D<sub>3</sub>. Significantly enriched gene sets are represented by colored dots. Gene sets are grouped into clusters (circles) based on the description of ontological categories to illustrate up- and down-regulated biological processes in H1975-OR cells treated with 1,25(OH)<sub>2</sub>D<sub>3</sub>.
