# Supplementary material for: Vitamin D3 Metabolites Demonstrate Prognostic Value in EGFR-Mutant Lung Adenocarcinoma and Can be Deployed to Oppose Acquired Therapeutic Resistance
Source: MDPI journal article supplement (doi:10.3390/cancers12030675), 2020-03-13
Supplement: s1 [file s1]

Related to Figure 2B; H1975 and H1975-OR cells

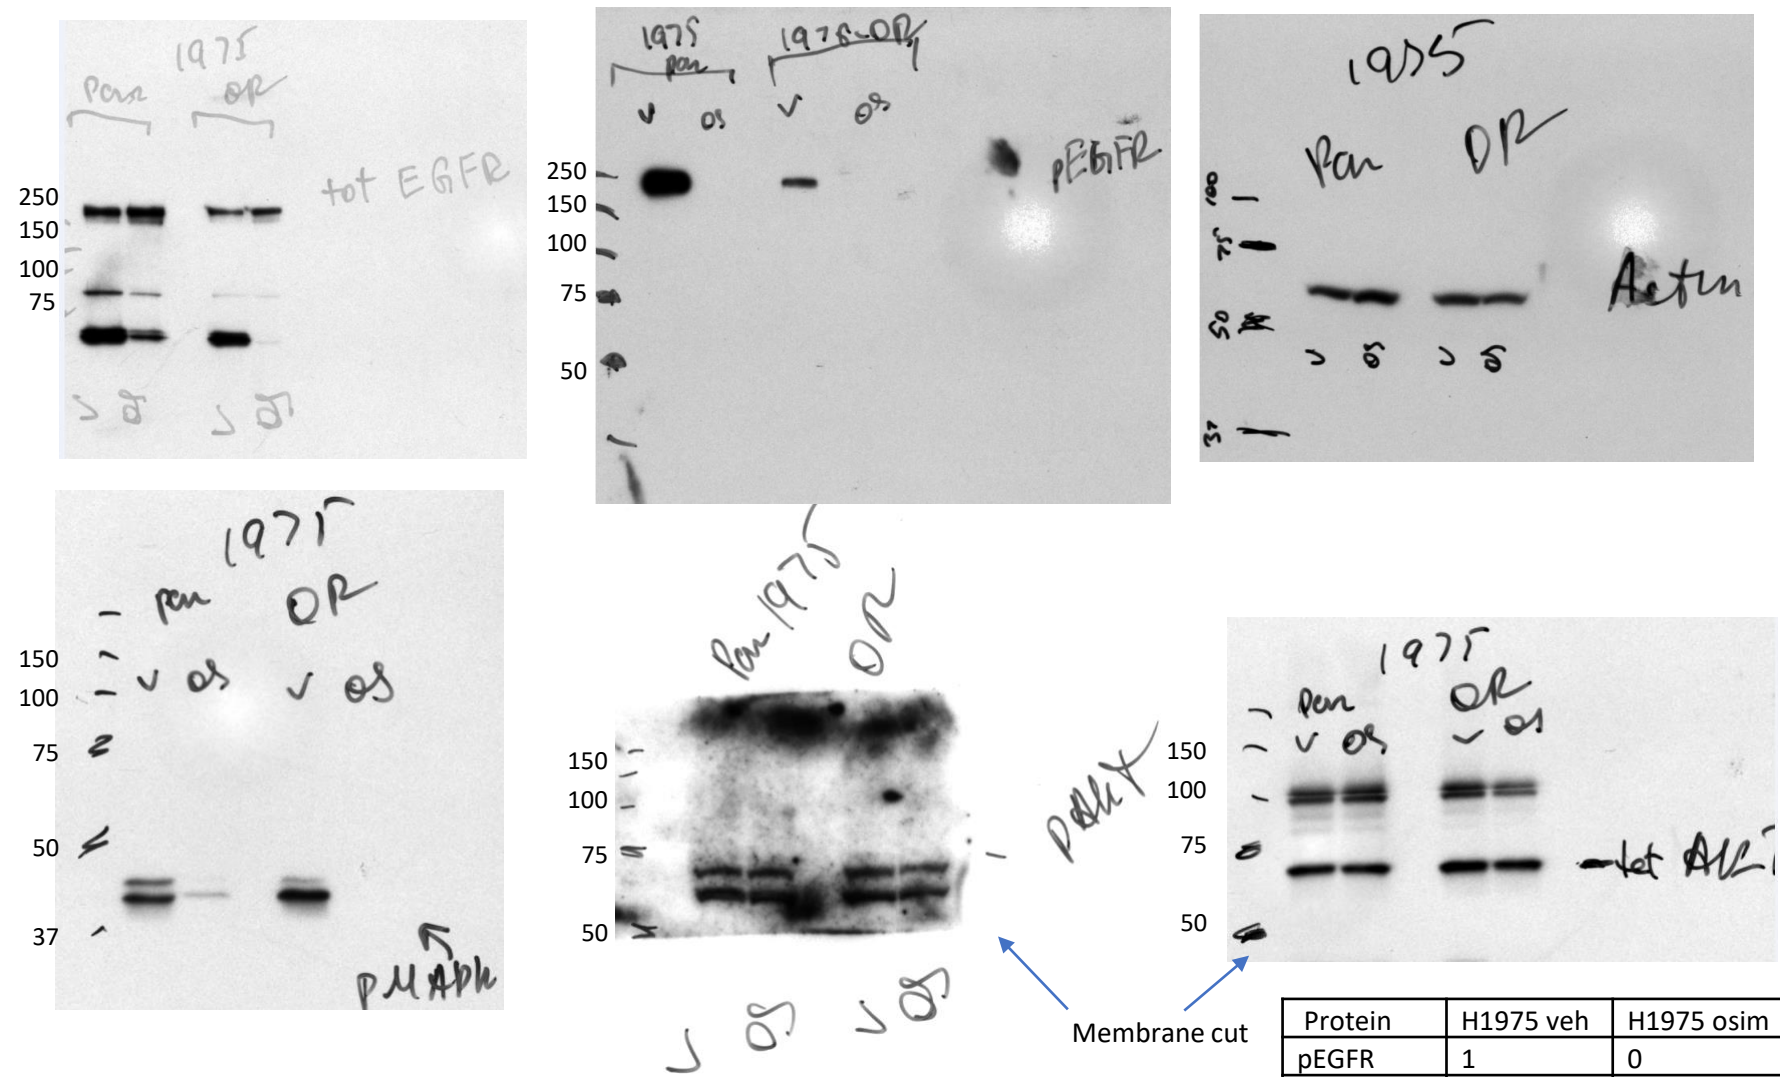

Membrane was serially probed. Bands at ~100kDA appearing On the total AKT blot are from prior STAT3 detection (not discussed in the current manuscript).

| Protein | H1975 veh | H1975 osim | H1975-OR veh | H1975-OR osim |
|---------|-----------|------------|--------------|---------------|
| pEGFR   | 1         | 0          | 0.50162867   | 0             |
| EGFR    | 1         | 0.826981   | 0.515671     | 0.598515      |
| pAKT    | 1         | 1.089721   | 0.839346     | 0.769347      |
| AKT     | 1         | 0.798991   | 1.218423     | 1.244072      |
| pERK1/2 | 1         | 0.091692   | 0.935976     | 0.025666      |

Related to Figure 2B; SH416 and SH416-ER cells

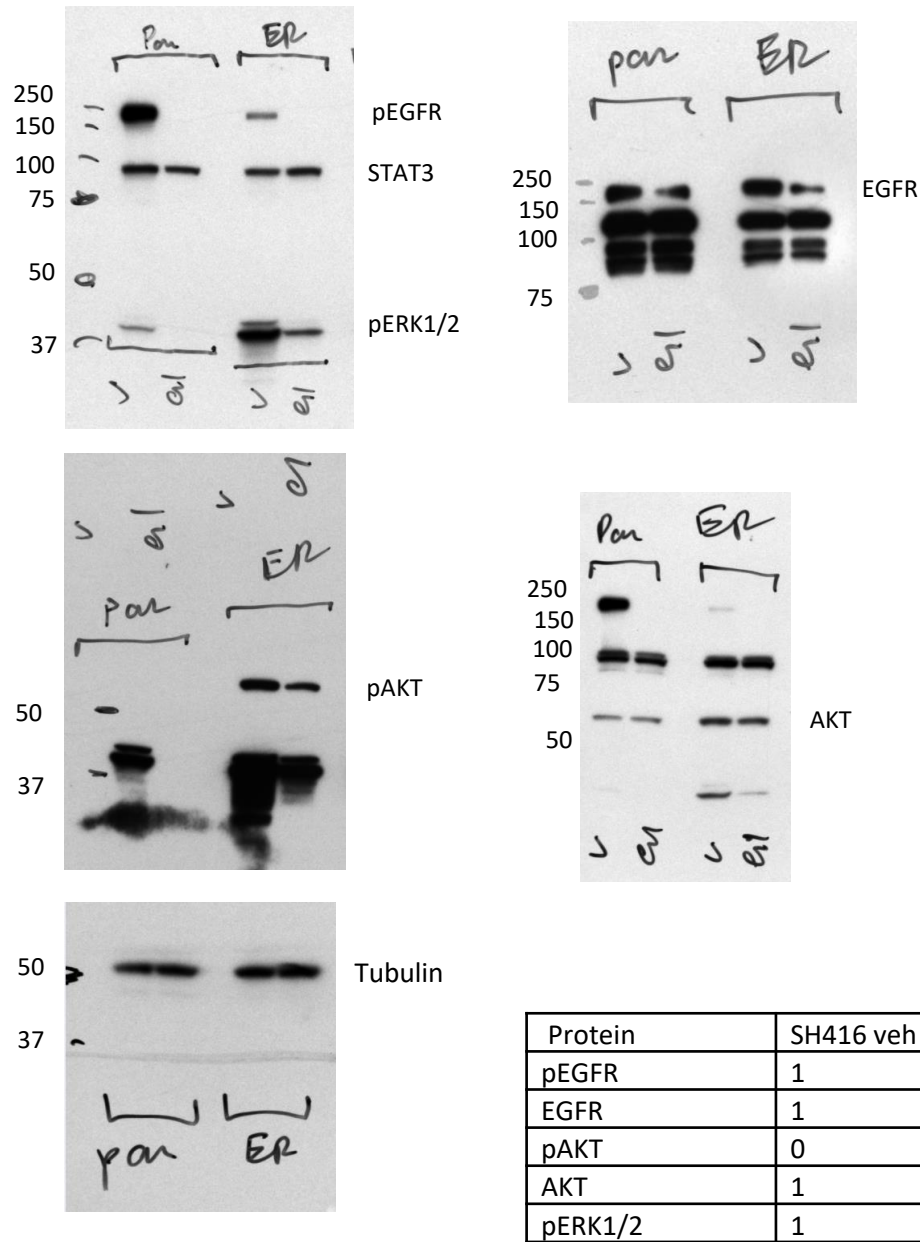

Membrane was serially probed. Bands at ~100kDa are from prior detection of STAT3 (not discussed in this manuscript). Bands of ~40kDa appearing on pAKT and AKT images are from previous pERK1/2 detection.

Related to Figure 2B; PC9 and PC9-ER cells

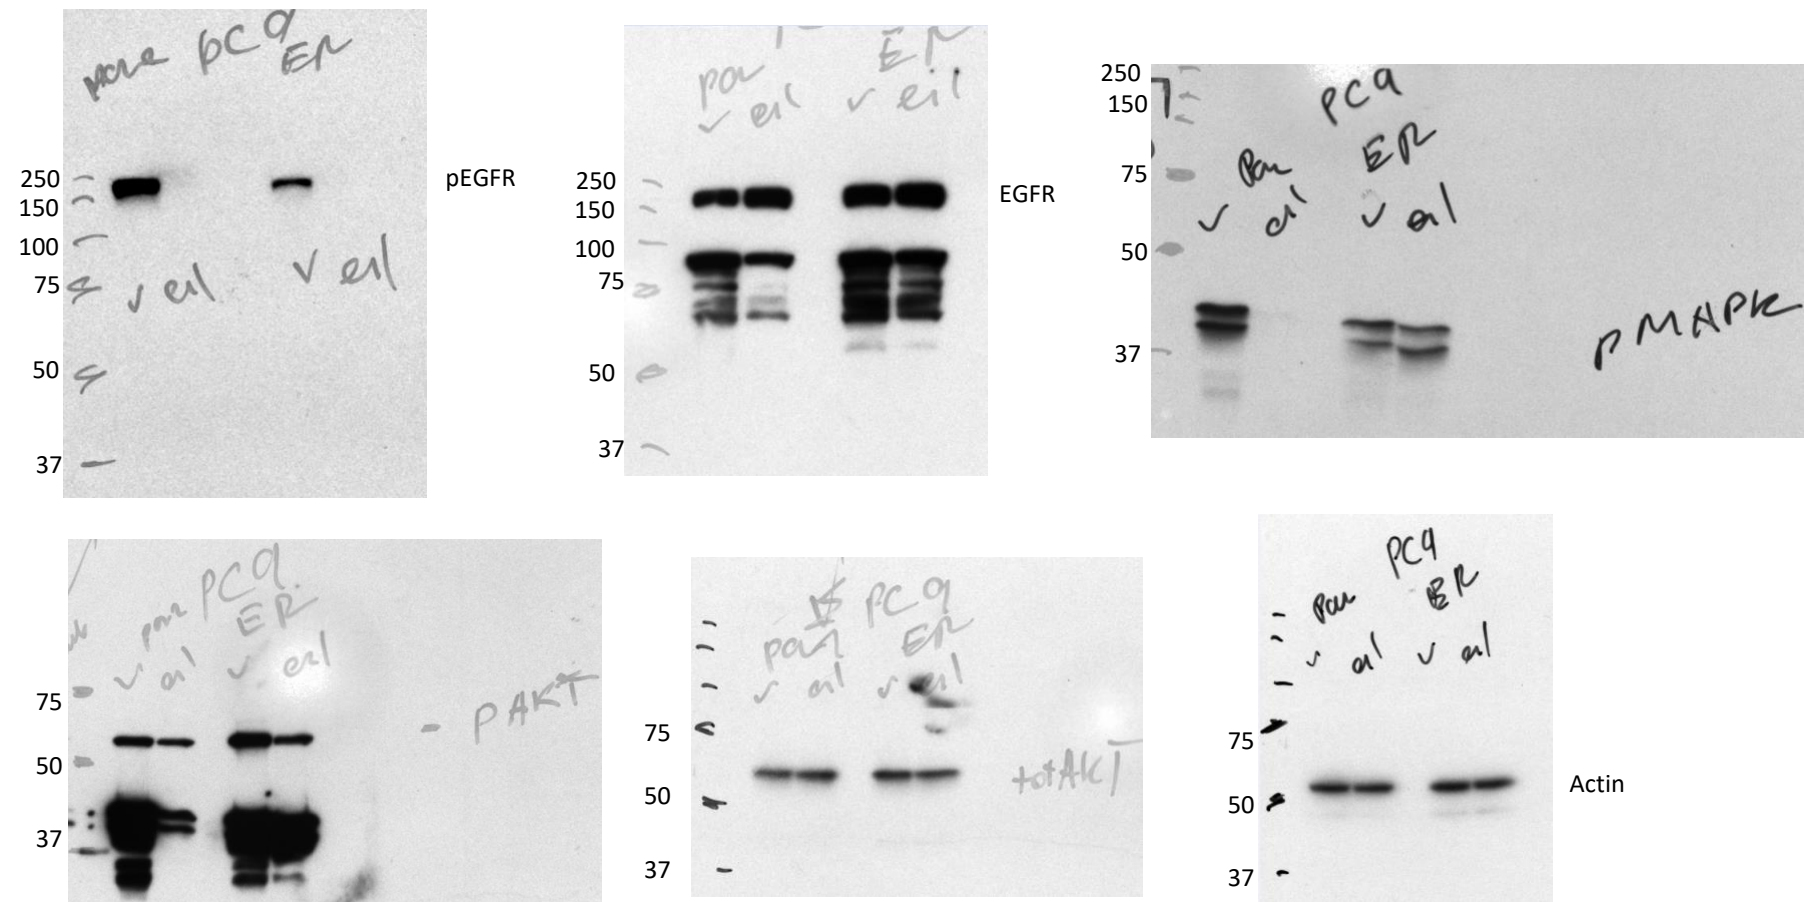

|         | PC9 veh | PC9 erlo | PC9-ER veh  | PC9-ER erlo |
|---------|---------|----------|-------------|-------------|
| pEGFR   | 1       | 0        | 0.209609814 | 0           |
| EGFR    | 1       | 1.371217 | 1.327668    | 1.50625     |
| pAKT    | 1       | 0.509423 | 1.221005    | 0.814961    |
| AKT     | 1       | 1.366308 | 1.256457    | 1.052674    |
| pERK1/2 | 1       | 0.037584 | 0.574764    | 0.640738    |

Membrane was serially probed. Bands of ~40kDa appearing on the pAKT image are from prior pERK1/2 detection. Bands of ~90kDa appearing on the EGFR blot are from prior detection of EZH2 (not discussed in this manuscript)

Related to Figure 2D; H1975 and H1975-OR cells

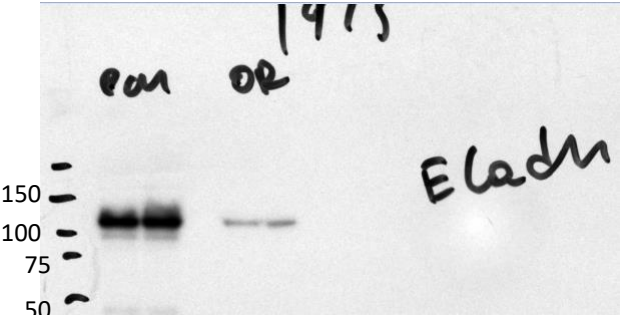

| Protein    | H1975 veh | H1975 osim | H1975-OR veh | H1975-OR osim |
|------------|-----------|------------|--------------|---------------|
| E-cadherin | 1         | 0.864641   | 0.216314     | 0.243656      |
| Vimentin   | 1         | 0.990695   | 3.208353     | 2.923499      |

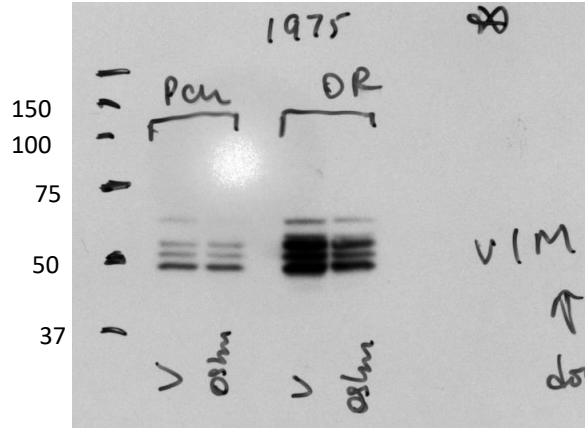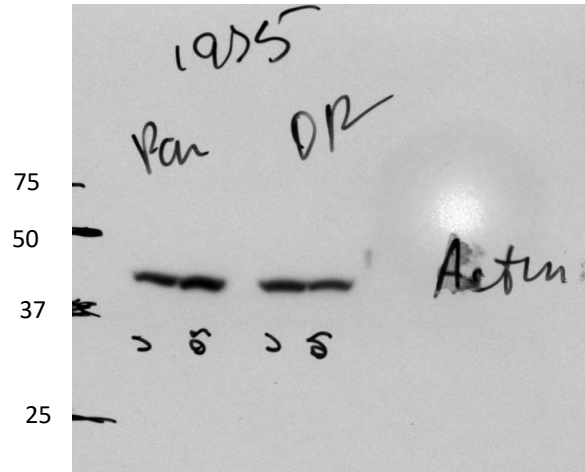

Related to Figure 2D; SH416 and SH416 ER cells

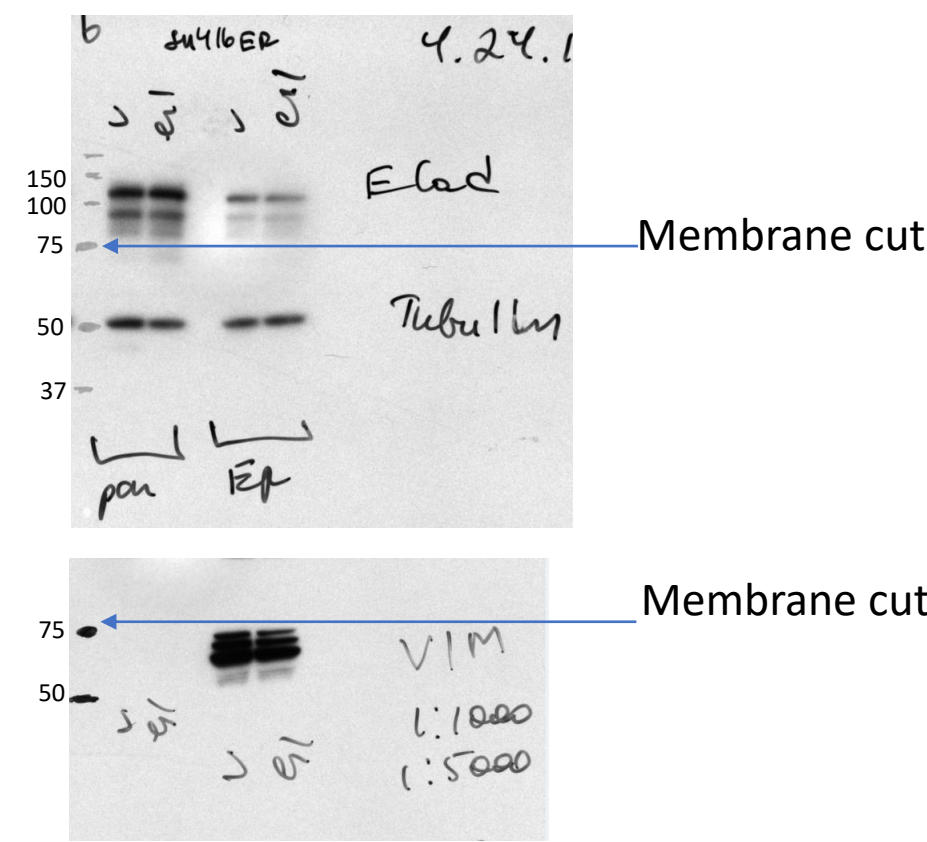

| Protein    | SH416 veh | SH416 erlo | SH416-ER veh | SH416-ER erlo |
|------------|-----------|------------|--------------|---------------|
| E-cadherin | 1         | 1.271376   | 0.585481     | 0.493888      |
| Vimentin   | 0         | 0          | 1            | 0.944333      |



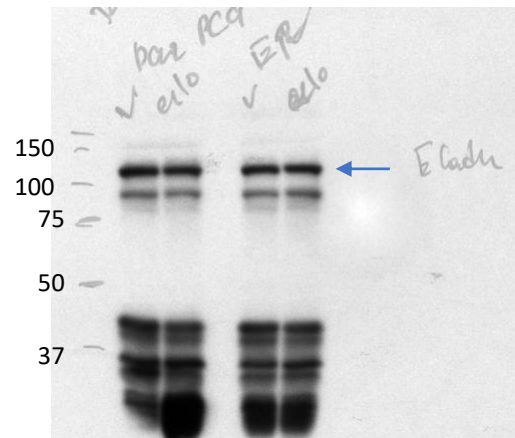

Related to Figure 2D; PC9 and PC9-ER cells

| Protein    | PC9 veh | PC9 erlo | PC9-ER veh | PC9-ER erlo |
|------------|---------|----------|------------|-------------|
| E-cadherin | 1       | 0.760619 | 0.862854   | 0.976294    |
| Vimentin   | 1       | 1.242039 | 1.326406   | 1.145299    |

Membrane was serially probed. Strong background bands on the vimentin blot are from previous E-cadherin detection.

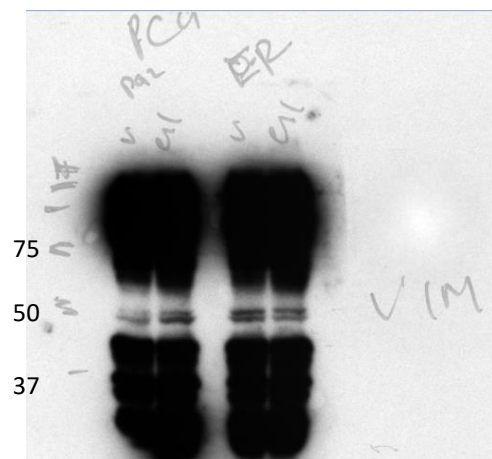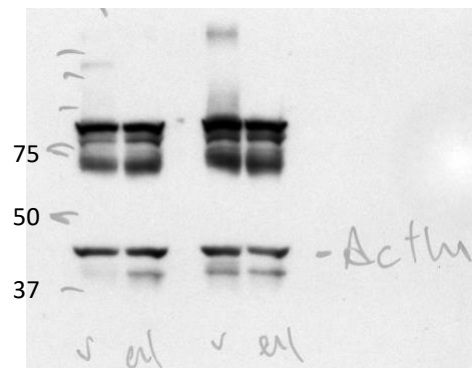

Related to Figure 3A; H1975-OR and PC9-ER cells

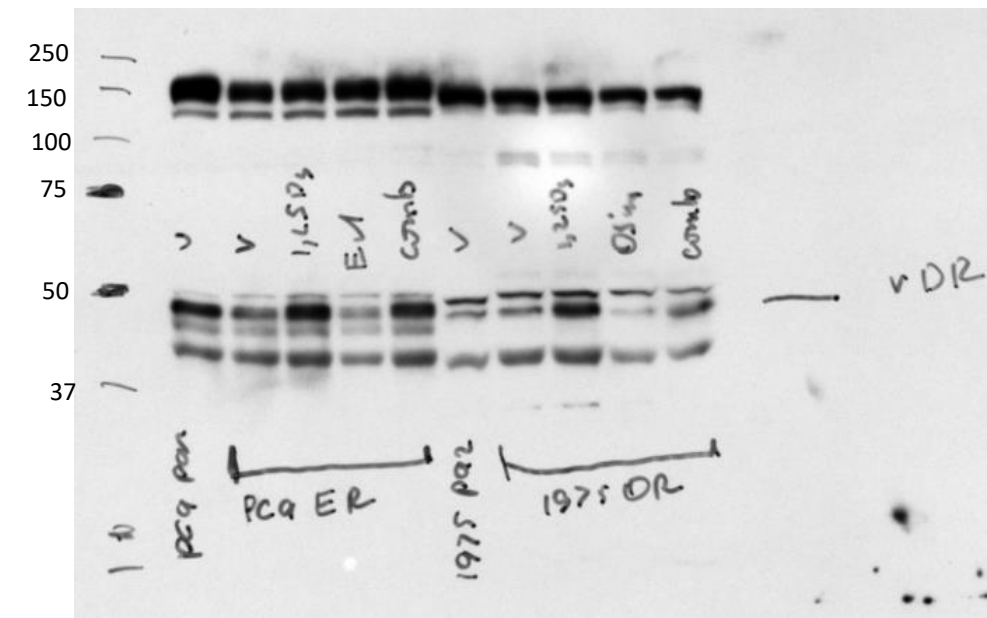

| Protein | H1975 | H1975-OR<br>veh | H1975-OR<br>1,25(OH)2D3 | H1975-OR<br>osim | H1975-OR<br>combo |
|---------|-------|-----------------|-------------------------|------------------|-------------------|
| VDR     | 1     | 0.917038        | 2.02483                 | 0.521215         | 1.582157          |

| Protein | PC9 | PC9-ER veh | PC9-ER<br>1,25(OH)2D3 | PC9-ER erlo | PC9-ER<br>combo |
|---------|-----|------------|-----------------------|-------------|-----------------|
| VDR     | 1   | 0.83627    | 1.172567              | 0.594546    | 1.07031         |

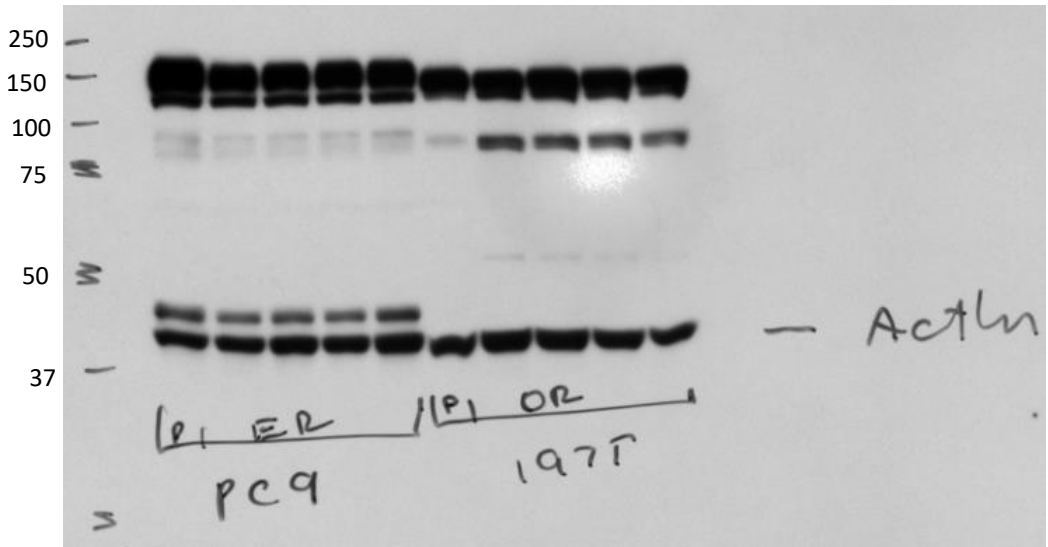

Membrane was serially probed. Bands appearing on both images between 75-150 kDa are from prior detection of AXL (not discussed in the current manuscript).

Related to Figure 3A; SH416-ER cells

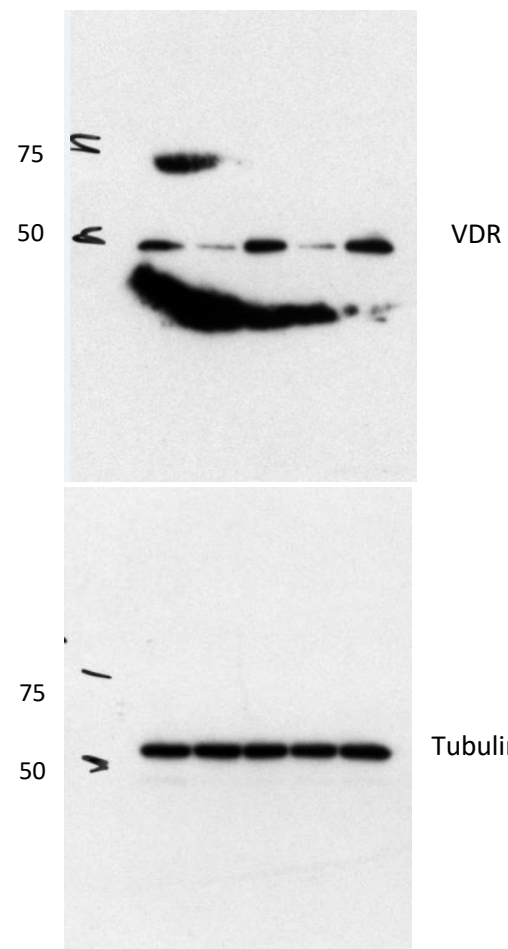

| Protein | SH416 | SH416-ER veh | SH416-ER 1,25(OH)2D3 | SH416-ER erlo | SH416-ER combo |
|---------|-------|--------------|----------------------|---------------|----------------|
| VDR     | 1     | 0.231282     | 1.289263             | 0.206617      | 1.321116       |



Related to Figure 4C; H1975-OR cells

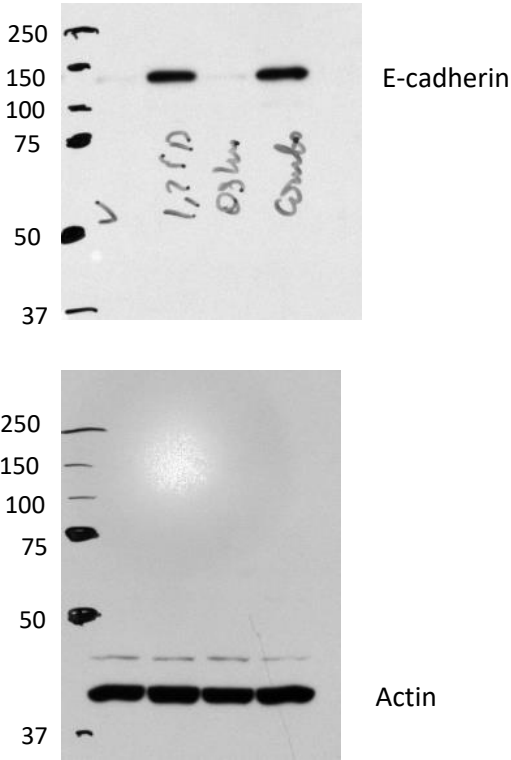

Related to Figure 4C; SH416-ER cells

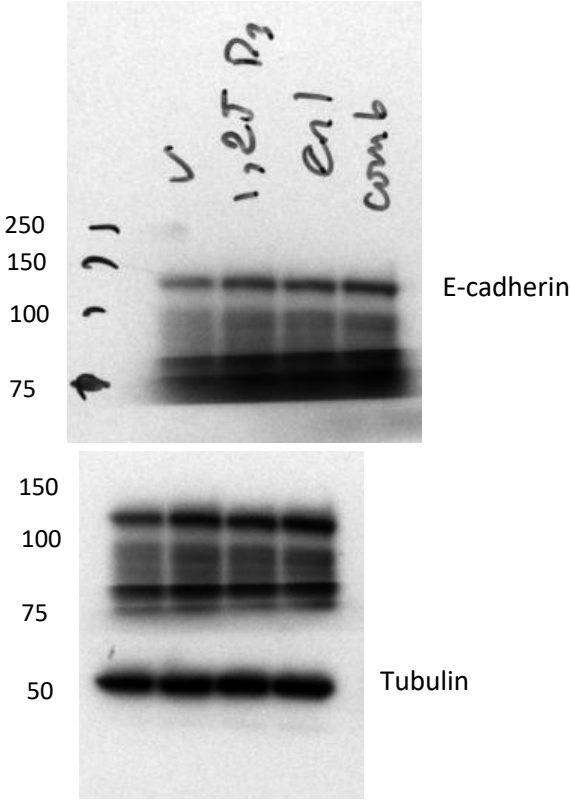

| Protein    | H1975-OR<br>veh | H1975-OR<br>1,25(OH)2D3 | H1975-OR<br>osim | H1975-OR<br>combo |
|------------|-----------------|-------------------------|------------------|-------------------|
| E-cadherin | 1               | 27.02011                | 0.768365         | 29.08314          |

| Protein    | SH416-ER<br>veh | SH416-ER<br>1,25(OH)2D3 | SH416-ER<br>osim | SH416-ER<br>combo |
|------------|-----------------|-------------------------|------------------|-------------------|
| E-cadherin | 1               | 1.22253                 | 1.084709         | 1.199782          |
